# Supplementary material for: Macromolecular Crowding Is Surprisingly Unable to Deform the Structure of a Model Biomolecular Condensate
Source: Biology (Basel). 2023 Jan 25;12(2):181. doi: 10.3390/biology12020181 (PMC9952705; doi:10.3390/biology12020181)
Supplement: Supplementary file 1 [file biology-12-00181-s001.zip]

Archive with 11 entries (11 files):
- S1.png
- S2.png
- S3.png
- Shillcock-ESI.pdf
- SM1.mp4
- SM2.mp4
- SM3.mp4
- SM4.mp4
- SM5.mp4
- SM6.mp4
- SM7.mp4
